# Supplementary material for: Identification of Key Genes and Prognostic Analysis between Chromophobe Renal Cell Carcinoma and Renal Oncocytoma by Bioinformatic Analysis
Source: Hindawi journal article supplement (doi:10.1155/2020/4030915), 2020-01-01
Supplement: f1 [file 4030915.f1.pdf]

Table S1. DEGs of the three expression profiles.

| DEGs           | Genes Name                                                                                                                                                                                                                                                                                                             |
|----------------|------------------------------------------------------------------------------------------------------------------------------------------------------------------------------------------------------------------------------------------------------------------------------------------------------------------------|
| Up-regulated   | SIGIRR,CLDN4,TMC5,ZNF165,ZEB1,EPN3,ESRP1,CLDN7,H<br>OOK2,KRT7,BSPRY,PKP2,AP1M2,SPINK7,PRSS8,HTATIP2,<br>MAL2,KRAS,CD74,RAB25,ODAM,NRXN3,PIK3C2G,SLC25A<br>1,IGFBP1,EBF2,INPP4B,H2AFX,CDS1,ANGPT1,SRD5A1,PA<br>K6,RASGRP1                                                                                               |
| Down-regulated | KCNG3,MANEA,MCOLN2,TENM2,SOD2,ABCA8,GMCL1P1,<br>BTN3A3,MSH2,RECK,HSD17B11,ECHDC1,CDH1,PCK1,MT<br>O1,SLC3A1,PDE1C,ACBD5,GNAS,TMED5,ASB1,CD58,AKR<br>1C3,NUP88,TXNDC9,PRKAR1A,ITIH5,HIBCH,STAT5B,CDC<br>27,PAFAH1B1,PRPF4B,ABCC4,ESM1,TNFSF10,TM2D1,FGFR<br>1,HAT1,SCAMP1,EDNRB,PERP,BNIP3,GADD45G,ARMCX1,<br>PITRM1,HGD |

Table S2. The GO and KEGG analyses of DEGs in ChrCC.

| GO Term    | Description                                                | Count | Genes                                                                                                           | P-value  |
|------------|------------------------------------------------------------|-------|-----------------------------------------------------------------------------------------------------------------|----------|
| GO:0001961 | Positive regulation of cytokine-mediated signaling pathway | 2     | PAFAH1B1, CD74                                                                                                  | 0.0241   |
| GO:0060117 | Auditory receptor cell development                         | 2     | FGFR1, PAFAH1B1                                                                                                 | 0.0288   |
| GO:0006810 | Transport                                                  | 3     | TMED5, PAFAH1B1, ACBD5                                                                                          | 0.0399   |
| GO:0070062 | Extracellular exosome                                      | 18    | EPN3,MAL2,TMC5,ECHDC1, HGD,CDH1,SLC3A1,CD74,PCK1,PRSS8,TNFSF10,CD58,S LC25A1,RAB25,GNAS, PAFAH1B1, ANGPT1,HIBCH | 0.010    |
| GO:0005654 | Nucleoplasm                                                | 12    | SCAMP1,EPN3,HTATIP2,PRP F4B,TM2D1,NUP88,PKP2,ES RP1,HAT1, ZEB1,CDC27,ACBD5                                      | 0.025    |
| GO:0005743 | Mitochondrial inner membrane                               | 4     | ABCA8,SLC25A1,SLC3A1, SOD2                                                                                      | 0.0347   |
| KEGG       |                                                            |       |                                                                                                                 | P.adjust |
| hsa04068   | FoxO signaling pathway                                     | 6     | TNFSF10,KRAS,GADD45G,B NIP3,SOD2,PCK1                                                                           | 0.0107   |
| hsa05218   | Cell adhesion molecules                                    | 5     | PAK6,FGFR1,KRAS,RASGRP 1,ANGPT1                                                                                 | 0.0424   |
| hsa05216   | Rap1 signaling pathway                                     | 4     | FGFR1, KRAS, GNAS, CDH1                                                                                         | 0.0424   |
| hsa04514   | Melanoma                                                   | 3     | FGFR1, KRAS, CDH1                                                                                               | 0.0423   |
